# Supplementary material
Source: PubMed Central journal article supplement (PMC3602877)
Supplement: 97320630009233S1.pdf [file 97320630009233S1.pdf]

## Supplementary material:

**Table 1:** Binding affinity of compounds against *WbGST* and *BmGST*

| Compounds                | Goldfitness Score |              | X-score (Kcal/mol) |              |
|--------------------------|-------------------|--------------|--------------------|--------------|
|                          | <i>WbGST</i>      | <i>BmGST</i> | <i>WbGST</i>       | <i>BmGST</i> |
| Albendazole              | 48.76             | 47.87        | -6.63              | -6.8         |
| Diethylcarbamazine       | 36.41             | 37.78        | -6.22              | -6.23        |
| Butylated hydroxyanisole | 33.90             | 32.92        | -6.45              | -6.93        |
| Ethacrynic acid          | 55.57             | 53.89        | -6.44              | -6.58        |
| Hexylglutathione         | 43.92             | 45.94        | -6.88              | -7.02        |
